# Supplementary material for: Patterns of DNA Barcode Variation in Canadian Marine Molluscs
Source: PubMed Central journal article supplement (PMC3990619; doi:10.1371/journal.pone.0095003), 2014-04-17
Supplement: pone.0095003.s001.pdf [file pone.0095003.s001.pdf]

**Supporting Information Table S1. Intraspecific and nearest neighbour distances and the number of individuals sampled for each of the 227 morphospecies in this study. A hyphen will appear in the intraspecific divergence columns for singletons.**

| Species                          | Number of Individuals | Mean Intra-specific (% K2P) | Max Intra-specific (% K2P) | NN Distance (% K2P) |
|----------------------------------|-----------------------|-----------------------------|----------------------------|---------------------|
| <i>Acanthodoris nanaimoensis</i> | 1                     | -                           | -                          | 11.21               |
| <i>Acanthodoris pilosa</i>       | 1                     | -                           | -                          | 4.27                |
| <i>Acmaea mitra</i>              | 10                    | 0.15                        | 0.62                       | 23.82               |
| <i>Admete sp. KL01</i>           | 3                     | 0                           | 0                          | 10.98               |
| <i>Admete viridula</i>           | 1                     | -                           | -                          | 10.98               |
| <i>Aeolidia papillosa</i>        | 3                     | 0.41                        | 0.62                       | 19.22               |
| <i>Aeolidia sp. KL01</i>         | 1                     | -                           | -                          | 13.12               |
| <i>Aeolidia sp. KL02</i>         | 9                     | 0.15                        | 0.46                       | 13.12               |
| <i>Alia carinata</i>             | 9                     | 0.46                        | 1.26                       | 6.77                |
| <i>Amphissa columbiana</i>       | 3                     | 0.64                        | 0.93                       | 4.26                |
| <i>Amphissa reticulata</i>       | 1                     | -                           | -                          | 5.45                |
| <i>Amphissa versicolor</i>       | 1                     | -                           | -                          | 4.26                |
| <i>Antalis antillarum</i>        | 2                     | 0.15                        | 0.15                       | 0.29                |
| <i>Antalis dentalis</i>          | 1                     | -                           | -                          | 2.36                |
| <i>Antalis entalis</i>           | 3                     | 0.19                        | 0.29                       | 15.81               |
| <i>Antalis inaequicostata</i>    | 1                     | -                           | -                          | 2.36                |
| <i>Antalis sp. PR-2003</i>       | 1                     | -                           | -                          | 0.29                |
| <i>Ariadnaria insignis</i>       | 6                     | 0.15                        | 0.31                       | 7.82                |
| <i>Armina californica</i>        | 2                     | 0.51                        | 0.51                       | 21.49               |
| <i>Astarte borealis</i>          | 1                     | -                           | -                          | 17.90               |
| <i>Astarte montagui</i>          | 12                    | 0.19                        | 0.68                       | 17.90               |
| <i>Axinopsida orbiculata</i>     | 2                     | 0.16                        | 0.16                       | 9.73                |
| <i>Axinopsida serricata</i>      | 2                     | 0.16                        | 0.16                       | 9.73                |
| <i>Bathyarca pectunculoides</i>  | 3                     | 0.30                        | 0.49                       | 29.18               |
| <i>Boonea cf. bisuturalis</i>    | 2                     | 0.31                        | 0.31                       | 21.81               |
| <i>Boreochiton beringensis</i>   | 1                     | -                           | -                          | 3.80                |
| <i>Boreotrophon cepula</i>       | 1                     | -                           | -                          | 7.69                |
| <i>Boreotrophon truncatus</i>    | 1                     | -                           | -                          | 7.69                |
| <i>Brachioteuthis beani</i>      | 2                     | 0.15                        | 0.15                       | 18.82               |
| <i>Buccinum aleuticum</i>        | 3                     | 0.32                        | 0.48                       | 9.07                |
| <i>Buccinum hydrophanum</i>      | 3                     | 0.11                        | 0.17                       | 5.34                |
| <i>Buccinum senshumaruae</i>     | 1                     | -                           | -                          | 5.34                |
| <i>Buccinum sp. KL01</i>         | 1                     | -                           | -                          | 2.87                |
| <i>Buccinum undatum</i>          | 2                     | 0.93                        | 0.93                       | 2.87                |
| <i>Cadlina luteomarginata</i>    | 2                     | 0                           | 0                          | 16.59               |
| <i>Calliostoma canaliculatum</i> | 1                     | -                           | -                          | 14.33               |
| <i>Calliostoma ligatum</i>       | 10                    | 0.17                        | 0.47                       | 14.33               |
| <i>Ceratostoma foliatum</i>      | 3                     | 0                           | 0                          | 10.11               |
| <i>Cidarina cidaris</i>          | 8                     | 0.19                        | 0.47                       | 23.39               |
| <i>Ciliatocardium ciliatum</i>   | 6                     | 0.22                        | 0.34                       | 23.03               |
| <i>Clinocardium nuttallii</i>    | 3                     | 0.10                        | 0.16                       | 20.49               |
| <i>Clione limacina</i>           | 17                    | 2.12                        | 6.35                       | 35.64               |
| <i>Colus stimpsoni</i>           | 1                     | -                           | -                          | 12.88               |
| <i>Crassostrea gigas</i>         | 4                     | 0.08                        | 0.16                       | 24.88               |
| <i>Crassostrea virginica</i>     | 9                     | 0.06                        | 0.69                       | 24.88               |
| <i>Crenella faba</i>             | 20                    | 0.03                        | 0.32                       | 18.41               |
| <i>Crepidula fornicata</i>       | 11                    | 1.47                        | 3.14                       | 15.90               |
| <i>Crepidula williamsi</i>       | 9                     | 1.66                        | 3.15                       | 15.90               |

|                                   |    |       |       |       |
|-----------------------------------|----|-------|-------|-------|
| <i>Crepidatella lingulata</i>     | 14 | 0.26  | 0.64  | 15.06 |
| <i>Cryptobranchia concentrica</i> | 13 | 0.29  | 0.64  | 23.82 |
| <i>Cryptochiton stelleri</i>      | 1  | -     | -     | 15.64 |
| <i>Cryptonatica affinis</i>       | 8  | 2.47  | 9.65  | 7.68  |
| <i>Cryptonatica aleutica</i>      | 2  | 0     | 0     | 6.99  |
| <i>Cryptonatica russa</i>         | 1  | -     | -     | 6.99  |
| <i>Cuspidaria glacialis</i>       | 1  | -     | -     | 30.42 |
| <i>Cuspidaria subtorta</i>        | 2  | 0     | 0     | 30.42 |
| <i>Cuthona columbiana</i>         | 1  | -     | -     | 18.36 |
| <i>Cyanoplax dentiens</i>         | 4  | 0.62  | 0.93  | 16.07 |
| <i>Cyanoplax fernaldi</i>         | 17 | 1.05  | 2.98  | 16.07 |
| <i>Cyclocardia borealis</i>       | 1  | -     | -     | 43.70 |
| <i>Cyclocardia crassidens</i>     | 3  | 0.11  | 0.16  | 39.09 |
| <i>Cylichna alba</i>              | 2  | 0.15  | 0.15  | 11.35 |
| <i>Cylichna cf. gouldii</i>       | 6  | 1.60  | 3.53  | 11.35 |
| <i>Dendronotus cf. robustus</i>   | 1  | -     | -     | 13.22 |
| <i>Dendronotus frondosus</i>      | 8  | 1.11  | 2.78  | 13.22 |
| <i>Dentalium pilsbryi</i>         | 2  | 21.22 | 21.22 | 0.29  |
| <i>Diaphana minuta</i>            | 1  | -     | -     | 19.60 |
| <i>Diaulula sandiegensis</i>      | 1  | -     | -     | 16.80 |
| <i>Dirona albolineata</i>         | 2  | 0.15  | 0.15  | 19.55 |
| <i>Discurria insessa</i>          | 10 | 0.06  | 0.31  | 19.25 |
| <i>Doris montereyensis</i>        | 5  | 0.66  | 0.97  | 19.38 |
| <i>Dosidicus gigas</i>            | 19 | 0.65  | 2.60  | 19.51 |
| <i>Ecrobia truncata</i>           | 11 | 0.19  | 0.46  | 17.17 |
| <i>Ennucula tenuis</i>            | 18 | 0.19  | 1.39  | 24.98 |
| <i>Ensis directus</i>             | 1  | -     | -     | 30.43 |
| <i>Entalina tetragona</i>         | 1  | -     | -     | 28.18 |
| <i>Enteractopus dofleini</i>      | 1  | -     | -     | 7.47  |
| <i>Episiphon yamakawai</i>        | 1  | -     | -     | 18.45 |
| <i>Eubranchus rupium</i>          | 5  | 0.70  | 1.10  | 18.19 |
| <i>Euspira heros</i>              | 8  | 0.18  | 0.31  | 5.30  |
| <i>Euspira pallida</i>            | 1  | -     | -     | 5.30  |
| <i>Fissidentalium candidum</i>    | 1  | -     | -     | 20.91 |
| <i>Fissurellidea bimaculata</i>   | 1  | -     | -     | 25.07 |
| <i>Flabellina cf. trophina</i>    | 1  | -     | -     | 20.24 |
| <i>Flabellina salmonacea</i>      | 5  | 1.45  | 2.84  | 16.96 |
| <i>Flabellina sp. KLO1</i>        | 2  | 0.77  | 0.77  | 16.96 |
| <i>Flabellina verrucosa</i>       | 7  | 0.07  | 0.16  | 22.40 |
| <i>Gadila aberrans</i>            | 2  | 2.99  | 2.99  | 18.64 |
| <i>Gastropteron pacificum</i>     | 13 | 0.47  | 1.24  | 19.25 |
| <i>Gemma gemma</i>                | 9  | 0.11  | 0.31  | 26.69 |
| <i>Glycymeris septentrionalis</i> | 2  | 0.16  | 0.16  | 29.18 |
| <i>Graptacme eborea</i>           | 2  | 0.29  | 0.29  | 14.99 |
| <i>Haminoea virescens</i>         | 7  | 0.22  | 0.46  | 19.93 |
| <i>Homalopoma baculum</i>         | 2  | 0     | 0     | 28.60 |
| <i>Homalopoma luridum</i>         | 1  | -     | -     | 23.76 |
| <i>Ilyanassa obsoleta</i>         | 12 | 0.47  | 0.95  | 14.70 |
| <i>Janolus fuscus</i>             | 1  | -     | -     | 23.89 |
| <i>Katharina tunicata</i>         | 8  | 1.01  | 1.74  | 18.39 |
| <i>Keenocardium blandum</i>       | 2  | 0.16  | 0.16  | 18.50 |
| <i>Keenocardium californiense</i> | 2  | 0     | 0     | 18.50 |
| <i>Kellia suborbicularis</i>      | 1  | -     | -     | 27.56 |
| <i>Lacuna sp. KLO1</i>            | 3  | 1.57  | 2.32  | 10.72 |
| <i>Lacuna vincta</i>              | 10 | 0.48  | 1.30  | 16.37 |
| <i>Lepidochitona flectens</i>     | 3  | 1.01  | 1.33  | 15.46 |

|                                 |    |      |       |       |
|---------------------------------|----|------|-------|-------|
| <i>Lepidozona interstincta</i>  | 11 | 0.33 | 1.08  | 4.63  |
| <i>Lepidozona radians</i>       | 4  | 0.24 | 0.34  | 4.63  |
| <i>Leptochiton alascensis</i>   | 2  | 0    | 0     | 12.01 |
| <i>Leptochiton rugatus</i>      | 2  | 0    | 0     | 12.01 |
| <i>Leukoma staminea</i>         | 1  | -    | -     | 27.00 |
| <i>Limacina helicina</i>        | 2  | 0.94 | 0.94  | 38.71 |
| <i>Lirabuccinum dirum</i>       | 8  | 0.04 | 0.18  | 13.94 |
| <i>Lirularia succincta</i>      | 2  | 0.95 | 0.95  | 21.66 |
| <i>Littorina littorea</i>       | 20 | 0.41 | 0.93  | 11.89 |
| <i>Littorina obtusata</i>       | 31 | 0.06 | 0.81  | 3.22  |
| <i>Littorina plena</i>          | 1  | -    | -     | 11.31 |
| <i>Littorina saxatilis</i>      | 56 | 0.45 | 1.45  | 3.22  |
| <i>Littorina sitkana</i>        | 19 | 0.24 | 0.93  | 8.55  |
| <i>Littorinimorpha sp. KL01</i> | 1  | -    | -     | 10.72 |
| <i>Littorinimorpha sp. KL03</i> | 1  | -    | -     | 8.26  |
| <i>Littorinimorpha sp. KL04</i> | 1  | -    | -     | 8.26  |
| <i>Loligo opalescens</i>        | 3  | 0.06 | 0.17  | 21.11 |
| <i>Lottia alveus</i>            | 1  | -    | -     | 22.56 |
| <i>Lottia digitalis</i>         | 8  | 0.08 | 0.66  | 19.75 |
| <i>Lottia paradigitalis</i>     | 14 | 0.11 | 0.51  | 18.12 |
| <i>Lottia pelta</i>             | 6  | 0.41 | 0.79  | 18.12 |
| <i>Lottia scutum</i>            | 8  | 0.38 | 1.48  | 23.45 |
| <i>Macoma balthica</i>          | 23 | 0.45 | 3.65  | 15.46 |
| <i>Macoma calcarea</i>          | 3  | 0.57 | 0.62  | 17.32 |
| <i>Macoma moesta</i>            | 5  | 0.64 | 1.01  | 17.32 |
| <i>Macoma nasuta</i>            | 1  | -    | -     | 15.46 |
| <i>Mactromeris polynyma</i>     | 1  | -    | -     | 32.01 |
| <i>Margarites costalis</i>      | 4  | 0.38 | 0.77  | 15.69 |
| <i>Margarites groenlandicus</i> | 1  | -    | -     | 10.43 |
| <i>Margarites helycinus</i>     | 11 | 0    | 0     | 10.86 |
| <i>Margarites olivaceus</i>     | 3  | 1.55 | 2.71  | 10.43 |
| <i>Margarites pupillus</i>      | 2  | 0.43 | 0.43  | 10.86 |
| <i>Margarites sp. KL01</i>      | 1  | -    | -     | 15.69 |
| <i>Mastigoteuthis magna</i>     | 1  | -    | -     | 19.29 |
| <i>Melanella thersites</i>      | 1  | -    | -     | 24.90 |
| <i>Mercenaria mercenaria</i>    | 8  | 0.28 | 0.76  | 25.63 |
| <i>Mitrella cf. tuberosa</i>    | 1  | -    | -     | 8.68  |
| <i>Modiolus modiolus</i>        | 1  | -    | -     | 38.40 |
| <i>Montereina lentiginosa</i>   | 1  | -    | -     | 15.60 |
| <i>Montereina nobilis</i>       | 2  | 0.46 | 0.46  | 15.60 |
| <i>Mopalia imporcata</i>        | 1  | -    | -     | 13.43 |
| <i>Mopalia kennerleyi</i>       | 9  | 1.18 | 1.75  | 13.12 |
| <i>Mopalia lignosa</i>          | 6  | 1.38 | 2.66  | 12.01 |
| <i>Mopalia vespertina</i>       | 1  | -    | -     | 12.01 |
| <i>Musculus discors</i>         | 1  | -    | -     | 12.13 |
| <i>Musculus niger</i>           | 3  | 0.11 | 0.17  | 12.13 |
| <i>Mya arenaria</i>             | 11 | 0.25 | 1.13  | 18.13 |
| <i>Mya truncata</i>             | 6  | 4.41 | 8.34  | 18.13 |
| <i>Mytilus californianus</i>    | 3  | 0.53 | 0.79  | 17.09 |
| <i>Mytilus edulis</i>           | 79 | 8.84 | 18.96 | 0     |
| <i>Mytilus trossulus</i>        | 17 | 5.90 | 17.82 | 0     |
| <i>Neptunea ithia</i>           | 1  | -    | -     | 13.05 |
| <i>Neptunea phoenicea</i>       | 1  | -    | -     | 13.05 |
| <i>Neverita lewisii</i>         | 2  | 0    | 0     | 14.53 |
| <i>Nucella canaliculata</i>     | 6  | 0.16 | 0.49  | 7.21  |
| <i>Nucella emarginata</i>       | 23 | 0.10 | 0.46  | 6.46  |

|                                   |    |       |       |       |
|-----------------------------------|----|-------|-------|-------|
| <i>Nucella lamellosa</i>          | 3  | 0.33  | 0.34  | 6.85  |
| <i>Nucella lapillus</i>           | 22 | 0.04  | 0.31  | 6.46  |
| <i>Nucella ostrina</i>            | 6  | 0.59  | 1.45  | 7.21  |
| <i>Nucula proxima</i>             | 1  | -     | -     | 24.98 |
| <i>Nuculana pernula</i>           | 3  | 0.62  | 0.92  | 1.58  |
| <i>Nuculana radiata</i>           | 1  | -     | -     | 1.58  |
| <i>Ocinebrina lurida</i>          | 1  | -     | -     | 9.60  |
| <i>Ocinebrina sclera</i>          | 1  | -     | -     | 9.60  |
| <i>Octopus rubescens</i>          | 1  | -     | -     | 7.47  |
| <i>Odostomia sp. KL01</i>         | 1  | -     | -     | 21.48 |
| <i>Odostomia sp. KL02</i>         | 1  | -     | -     | 21.48 |
| <i>Oenopota bicarinata</i>        | 4  | 0.18  | 0.31  | 11.56 |
| <i>Oenopota sp. KL01</i>          | 4  | 0.92  | 1.61  | 4.91  |
| <i>Oenopota sp. KL02</i>          | 1  | -     | -     | 8.53  |
| <i>Oenopota sp. KL03</i>          | 1  | -     | -     | 4.91  |
| <i>Oenopota sp. KL04</i>          | 1  | -     | -     | 8.53  |
| <i>Olivella baetica</i>           | 1  | -     | -     | 14.5  |
| <i>Onchidella borealis</i>        | 26 | 0.57  | 2.99  | 10.48 |
| <i>Onchidella cf. carpenteri</i>  | 1  | -     | -     | 10.48 |
| <i>Onchidoris bilamellata</i>     | 4  | 0.39  | 0.62  | 16.60 |
| <i>Onchidoris muricata</i>        | 1  | -     | -     | 16.60 |
| <i>Palio dubia</i>                | 3  | 0.43  | 0.64  | 4.27  |
| <i>Petalconchus compactus</i>     | 5  | 0     | 0     | 29.03 |
| <i>Philina lima</i>               | 3  | 0     | 0     | 23.21 |
| <i>Pododesmus macrochisma</i>     | 6  | 0.06  | 0.28  | 45.11 |
| <i>Polyschides carolinensis</i>   | 1  | -     | -     | 18.64 |
| <i>Pomaulax gibberosus</i>        | 1  | -     | -     | 20.09 |
| <i>Portlandia arctica</i>         | 3  | 0     | 0     | 38.89 |
| <i>Propebela fidicula</i>         | 1  | -     | -     | 11.35 |
| <i>Propebela turricula</i>        | 7  | 2.43  | 4.17  | 11.35 |
| <i>Pulsellum salishorum</i>       | 2  | 0.44  | 0.44  | 31.82 |
| <i>Puncturella galeata</i>        | 1  | -     | -     | 27.25 |
| <i>Retusa obtusa</i>              | 4  | 0.96  | 1.56  | 20.16 |
| <i>Rhabdus rectius</i>            | 4  | 11.47 | 22.45 | 14.99 |
| <i>Rossia glaucopsis</i>          | 1  | -     | -     | 2.83  |
| <i>Rossia pacifica</i>            | 5  | 0.06  | 0.16  | 2.83  |
| <i>Rossia palpebrosa</i>          | 1  | -     | -     | 11.70 |
| <i>Rostanga pulchra</i>           | 2  | 1.55  | 1.55  | 19.06 |
| <i>Ruditapes philippinarum</i>    | 1  | -     | -     | 25.63 |
| <i>Saxidomus gigantea</i>         | 4  | 0.36  | 0.62  | 26.69 |
| <i>Scabrotrophon fabricii</i>     | 1  | -     | -     | 9.66  |
| <i>Scabrotrophon maltzani</i>     | 3  | 0.72  | 1.08  | 9.66  |
| <i>Serpulorbis sp. KL01</i>       | 1  | -     | -     | 29.03 |
| <i>Serripes laperousii</i>        | 2  | 0.30  | 0.30  | 21.05 |
| <i>Similipecten greenlandicus</i> | 10 | 0.07  | 0.50  | 46.87 |
| <i>Siphonodentalium lobatum</i>   | 2  | 0     | 0     | 22.92 |
| <i>Spisula solidissima</i>        | 4  | 0.15  | 0.31  | 31.79 |
| <i>Stenosemus albus</i>           | 5  | 0.05  | 0.15  | 20.15 |
| <i>Tachyrhynchus erosus</i>       | 3  | 0.08  | 0.25  | 23.12 |
| <i>Tachyrhynchus reticulatus</i>  | 4  | 1.49  | 2.98  | 25.25 |
| <i>Tegula funebris</i>            | 4  | 0.41  | 0.62  | 13.12 |
| <i>Tegula pulligo</i>             | 4  | 0.31  | 0.46  | 13.12 |
| <i>Tellina nuculoides</i>         | 3  | 0     | 0     | 18.91 |
| <i>Thyasira gouldi</i>            | 7  | 10.04 | 17.72 | 17.97 |
| <i>Tonicella insignis</i>         | 1  | -     | -     | 10.92 |
| <i>Tonicella lineata</i>          | 15 | 1.12  | 2.99  | 5.07  |

|                                |    |       |       |       |
|--------------------------------|----|-------|-------|-------|
| <i>Tonicella marmorea</i>      | 44 | 0.42  | 1.75  | 10.92 |
| <i>Tonicella rubra</i>         | 1  | -     | -     | 3.80  |
| <i>Tonicella undocaerulea</i>  | 4  | 1.30  | 1.60  | 5.07  |
| <i>Tresus capax</i>            | 4  | 0.62  | 0.93  | 31.79 |
| <i>Trichotropis cancellata</i> | 19 | 0.82  | 1.87  | 7.82  |
| <i>Triopha catalinae</i>       | 3  | 17.99 | 26.39 | 16.59 |
| <i>Urosalpinx cinerea</i>      | 7  | 0     | 0     | 11.27 |
| <i>Yoldia hyperborea</i>       | 6  | 0.17  | 0.51  | 35.49 |
| <i>Yoldia myalis</i>           | 2  | 0     | 0     | 43.80 |
| <i>Yoldiella frigida</i>       | 2  | 0.31  | 0.31  | 14.26 |
| <i>Yoldiella nana</i>          | 2  | 0.15  | 0.15  | 14.26 |
