# Supplementary material for: Patterns of DNA Barcode Variation in Canadian Marine Molluscs
Source: PubMed Central journal article supplement (PMC3990619; doi:10.1371/journal.pone.0095003), 2014-04-17
Supplement: pone.0095003.s002.pdf [file pone.0095003.s002.pdf]

**Supporting Information Table S2: Species found at each locality in this study.** This table excludes 23 GenBank specimens (Scaphopoda) that lack locality information but are known to occur in Canada.

| <b>Species</b>                    | <b>Region (Province/State)</b> |
|-----------------------------------|--------------------------------|
| <b>Bivalvia</b>                   | Bamfield (British Columbia)    |
| <i>Clinocardium nuttallii</i>     |                                |
| <i>Crassostrea gigas</i>          |                                |
| <i>Cyclocardia crassidens</i>     |                                |
| <i>Keenocardium californiense</i> |                                |
| <i>Macoma nasuta</i>              |                                |
| <i>Mya arenaria</i>               |                                |
| <i>Mytilus californianus</i>      |                                |
| <i>Mytilus trossulus</i>          |                                |
| <i>Ruditapes philippinarum</i>    |                                |
| <i>Tresus capax</i>               |                                |
| <b>Gastropoda</b>                 |                                |
| <i>Amphissa columbiana</i>        |                                |
| <i>Amphissa versicolor</i>        |                                |
| <i>Armina californica</i>         |                                |
| <i>Cadlina luteomarginata</i>     |                                |
| <i>Calliostoma ligatum</i>        |                                |
| <i>Ceratostoma foliatum</i>       |                                |
| <i>Cidarina cidaris</i>           |                                |
| <i>Crepidatella lingulata</i>     |                                |
| <i>Diaulula sandiegensis</i>      |                                |
| <i>Homalopoma baculum</i>         |                                |
| <i>Fissurellidea bimaculata</i>   |                                |
| <i>Flabellina verrucosa</i>       |                                |
| <i>Littorina sitkana</i>          |                                |
| <i>Lottia digitalis</i>           |                                |
| <i>Lottia paradigitalis</i>       |                                |
| <i>Melanella thersites</i>        |                                |
| <i>Montereina nobilis</i>         |                                |
| <i>Nucella lamellosa</i>          |                                |
| <i>Nucella ostrina</i>            |                                |
| <i>Ocinebrina lurida</i>          |                                |
| <i>Odostomia sp. KL02</i>         |                                |
| <i>Onchidella borealis</i>        |                                |
| <i>Onchidella cf. carpenteri</i>  |                                |
| <i>Onchidoris bilamellata</i>     |                                |
| <i>Petalconchus compactus</i>     |                                |
| <i>Pomaulax gibberosus</i>        |                                |
| <i>Puncturella galeata</i>        |                                |
| <i>Serpulorbis sp. KL01</i>       |                                |
| <i>Tegula pulligo</i>             |                                |
| <i>Tegula funebris</i>            |                                |
| <i>Trichotropis cancellata</i>    |                                |
| <b>Polyplacophora</b>             |                                |
| <i>Cyanoplax dentiens</i>         |                                |
| <i>Katharina tunicata</i>         |                                |
| <i>Lepidochitona flectens</i>     |                                |
| <i>Lepidozona interstincta</i>    |                                |

*Lepidozona radians*  
*Mopalia improcata*  
*Tonicella undocaerulea*

**Scaphopoda**

*Rhabdus rectius*

---

**Bivalvia**

Haida Gwaii (British Columbia)

*Mytilus trossulus*  
*Pododesmus macrochisma*

**Cephalopoda**

*Enteroctopus dofleini*  
*Loligo opalescens*  
*Octopus rubescens*  
*Rossia pacifica*

**Gastropoda**

*Acmaea mitra*  
*Alia carinata*  
*Amphissa reticulata*  
*Armina californica*  
*Calliostoma canaliculatum*  
*Calliostoma ligatum*  
*Cidarina cidaris*  
*Crepidula williamsi*  
*Crepidatella lingulata*  
*Dirona albolineata*  
*Doris montereyensis*  
*Flabellina verrucosa*  
*Haminoea virescens*  
*Homalopoma luridum*  
*Janolus fuscus*  
*Lacuna vincta*  
*Lirabuccinum dirum*  
*Lirularia succincta*  
*Littorina plena*  
*Littorina sitkana*  
*Lottia digitalis*  
*Lottia paradigitalis*  
*Lottia pelta*  
*Lottia scutum*  
*Mitrella cf. tuberosa*  
*Montereina lentiginosa*  
*Neptunea ithia*  
*Neptunea phoenicea*  
*Nucella canaliculata*  
*Nucella lamellosa*  
*Ocinebrina sclera*  
*Onchidoris muricata*  
*Rostanga pulchra*  
*Tegula pulligo*

**Polyplacophora**

*Cyanoplax dentiens*  
*Lepidochitona flectens*

*Lepidozona interstincta*  
*Lepidozona radians*  
*Leptochiton rugatus*  
*Mopalia kennerleyi*  
*Mopalia lignosa*  
*Mopalia vespertina*  
*Tonicella lineata*

---

**Bivalvia** Nanaimo (British Columbia)  
*Crassostrea gigas*

---

**Bivalvia** Pacific Rim National Park (British Columbia)  
*Mytilus californianus*  
*Mytilus trossulus*

**Gastropoda**  
*Lottia paradigitalis*  
*Lottia scutum*  
*Nucella ostrina*  
*Tegula funebris*

---

**Cephalopoda** Tofino (British Columbia)  
*Dosidicus gigas*

---

**Bivalvia** Beaufort Sea  
*Astarte montagui*  
*Batharca pectunculoides*  
*Ciliatocardium ciliatum*  
*Cuspidaria glacialis*  
*Cuspidaria subtorta*  
*Ennucula tenuis*  
*Macoma moesta*  
*Musculus discors*  
*Musculus niger*  
*Nuculana pernula*  
*Similipecten greenlandicus*  
*Yoldia hyperborea*  
*Yoldia myalis*  
*Yoldiella frigida*  
*Yoldiella nana*

**Gastropoda**  
*Boreotrophon truncatus*  
*Buccinum sensumaruae*  
*Cryptonatica affinis*  
*Cylichna alba*  
*Cylichna cf. gouldii*  
*Margarites costalis*  
*Oenopota sp. KL04*  
*Tachyrhynchus reticulatus*

---

**Bivalvia** Cook Inlet (Alaska)  
*Axinopsida serricata*  
*Clinocardium nuttallii*  
*Glycymeris septentrionalis*  
*Keenocardium blandum*

*Keenocardium californiense*  
*Kellia suborbicularis*  
*Leukoma staminea*  
*Mactromeris polynyma*  
*Mytilus trossulus*  
*Pododesmus macrochisma*  
*Saxidomus gigantea*  
*Tellina nuculoides*

### **Gastropoda**

*Acanthodoris nanaimoensis*  
*Acanthodoris pilosa*  
*Acmaea mitra*  
*Aeolidia papillosa*  
*Amphissa columbiana*  
*Ariadnaria insignis*  
*Boreotrophon cepula*  
*Buccinum aleuticum*  
*Calliostoma ligatum*  
*Crepidula williamsi*  
*Cryptobranchia concentrica*  
*Cryptonatica affinis*  
*Cryptonatica aleutica*  
*Cryptonatica russa*  
*Discurria insessa*  
*Doris montereyensis*  
*Eubranchus rupium*  
*Flabellina cf. trophina*  
*Flabellina verrucosa*  
*Gastropterion pacificum*  
*Lacuna sp. KL01*  
*Lacuna vincta*  
*Lirabuccinum dirum*  
*Lirularia succincta*  
*Littorina sitkana*  
*Littorinimorpha sp. KL01*  
*Littorinimorpha sp. KL03*  
*Littorinimorpha sp. KL04*  
*Lottia alveus*  
*Lottia digitalis*  
*Lottia pelta*  
*Lottia scutum*  
*Margarites groenlandicus*  
*Margarites pupillus*  
*Neverita lewisii*  
*Nucella canaliculata*  
*Nucella emarginata*  
*Odostomia sp. KL01*  
*Olivella baetica*  
*Onchidella borealis*  
*Propebela fidicula*  
*Scabrotrophon maltzani*  
*Trichotropis cancellata*  
*Triopha catalinae*

**Polyplacophora**

*Boreochiton beringensis*  
*Cryptochiton stelleri*  
*Cyanoplax fernaldi*  
*Katharina tunicata*  
*Leptochiton alascensis*  
*Mopalia kennerleyi*  
*Tonicella insignis*  
*Tonicella lineata*

---

**Bivalvia**

Baffin Bay (Greenland)

*Astarte montagui*  
*Bathyarca pectunculoides*

---

**Bivalvia**

Cornwallis Island (Nunavut)

*Mya truncata*

**Gastropoda**

*Aeolidia sp. KL02*

**Polyplacophora**

*Stenosemus albus*

---

**Gastropoda**

Devon Island (Nunavut)

*Dendronotus frondosus*  
*Flabellina salmonacea*  
*Margarites olivaceus*

---

**Bivalvia**

Igloolik (Nunavut)

*Ennucula tenuis*  
*Macoma calcarea*  
*Mya truncata*  
*Nuculana radiata*  
*Portlandia arctica*  
*Serripes laperousii*

**Cephalopoda**

*Rossia glaucopis*

**Gastropoda**

*Buccinum hydrophanum*  
*Clione limacina*  
*Cylichna cf. gouldii*  
*Dendronotus frondosus*  
*Flabellina salmonacea*  
*Margarites helacinus*  
*Margarites sp. KL01*  
*Scabrotrophon fabricii*

**Polyplacophora**

*Tonicella marmorea*

---

**Bivalvia**

Resolute (Nunavut)

*Mya truncata*  
*Serripes laperousii*

**Cephalopoda**

*Rossia palpebrosa*

**Gastropoda**

*Admete sp. KL01*

*Aeolidia sp. 2*

*Buccinum hydrophanum*

*Buccinum sp. KL01*

*Clione limacina*

*Dendronotus frondosus*

*Margarites olivaceus*

*Oenopota sp. KL01*

*Oenopota sp. KL03*

*Philine lima*

*Retusa obtusa*

**Polyplacophora**

*Stenosemus albus*

*Tonicella marmorea*

---

**Bivalvia**

Churchill (Manitoba)

*Axinopsida orbiculata*

*Crenella faba*

*Ennucula tenuis*

*Macoma balthica*

*Mytilus edulis*

*Mytilus trossulus*

**Gastropoda**

*Admete viridula*

*Aeolidia sp. KL01*

*Diaphana minuta*

*Ecrobia truncata*

*Flabellina sp. KL01*

*Littorina saxatilis*

*Limacina helicina*

*Margarites costalis*

*Margarites helicinus*

*Oenopota bicarinata*

*Oenopota sp. KL02*

*Philine lima*

*Propebela turricula*

*Retusa obtusa*

**Polyplacophora**

*Stenosemus albus*

*Tonicella marmorea*

---

**Gastropoda**

Baie Ste-Marguerite (Quebec)

*Palio dubia*

*Propebela turricula*

*Tachyrhynchus erosus*

---

**Bivalvia**

St. Andrews (New Brunswick)

*Astarte borealis*

*Cyclocardia borealis*

*Mercenaria mercenaria*  
*Modiolus modiolus*  
*Mytilus edulis*  
*Mytilus trossulus*  
*Nucula proxima*  
*Spisula solidissima*

**Gastropoda**

*Buccinum undatum*  
*Colus stimpsoni*  
*Crepidula fornicata*  
*Cuthona columbiana*  
*Dendronotus cf. robustus*  
*Dendronotus frondosus*  
*Euspira heros*  
*Euspira pallida*  
*Flabellina salmonacea*  
*Lacuna vincta*  
*Littorina littorea*  
*Littorina obtusata*  
*Littorina saxatilis*  
*Nucella lapillus*  
*Onchidoris bilamellata*

**Polyplacophora**

*Tonicella marmorea*  
*Tonicella rubra*

---

**Gastropoda**

*Littorina littorea*

Fundy National Park (New Brunswick)

---

**Cephalopoda**

*Brachioteuthis beani*  
*Mastigoteuthis magna*

Maritimes Region

---

**Bivalvia**

*Mytilus edulis*  
*Mytilus trossulus*

Peggy's Cove (Nova Scotia)

**Gastropoda**

*Lacuna vincta*  
*Littorina littorea*  
*Littorina obtusata*  
*Littorina saxatilis*  
*Nucella lapillus*

---

**Bivalvia**

*Mytilus edulis*

Lunenburg (Nova Scotia)

**Gastropoda**

*Littorina obtusata*  
*Littorina saxatilis*  
*Urosalpinx cinerea*

---

**Bivalvia**

*Mytilus edulis*

Prospect (Nova Scotia)

**Gastropoda***Littorina obtusata**Littorina littorea*

---

**Bivalvia**

Riverport (Nova Scotia)

*Gemma gemma***Gastropoda***Euspira heros**Littorina littorea*

---

**Gastropoda**

Wolfville (Nova Scotia)

*Ilyanassa obsoleta*

---

**Gastropoda**

Cavendish (Prince Edward Island)

*Ilyanassa obsoleta**Littorina saxatilis*

---

**Bivalvia**

Malpeque Bay (Prince Edward Island)

*Gemma gemma**Mercenaria mercenaria***Gastropoda***Boonea cf. bisuturalis**Ecrobia truncata**Ilyanassa obsoleta**Littorina littorea**Littorina saxatilis*

---

**Bivalvia**

Summerside (Prince Edward Island)

*Crassostrea virginica**Mercenaria mercenaria*

---

**Bivalvia**

Tea Hill (Prince Edward Island)

*Crassostrea virginica**Ensis directus**Mytilus edulis***Gastropoda***Ilyanassa obsoleta**Nucella lapillus*

---

**Bivalvia**Bonne Bay (Newfoundland and  
Labrador)*Macoma balthica**Mya arenaria**Thyasira gouldi*

---

**Bivalvia**Main Brook (Newfoundland and  
Labrador)*Mya arenaria*

---

**Bivalvia**Nachvak Fjord (Newfoundland and  
Labrador)*Ennucula tenuis*



**Polyplacophora***Tonicella marmorea*

---

**Bivalvia***Yoldia hyperborea*Saglek Fjord (Newfoundland and  
Labrador)

---

**Gastropoda***Littorina littorea**Nucella lapillus*Terra Nova National Park (Newfoundland  
and Labrador)

---

**Scaphopoda***Siphonodentalium lobatum*

Iceland (Northwest Atlantic)

---
